# Supplementary material for: Improved Porosity of Insect Proof Screens Enhances Quality Aspects of Zucchini Squash without Compromising the Yield
Source: PubMed Central journal article supplement (PMC7600595; doi:10.3390/plants9101264), 2020-09-24
Supplement: plants-09-01264-s001.pdf [file plants-09-01264-s001.pdf]

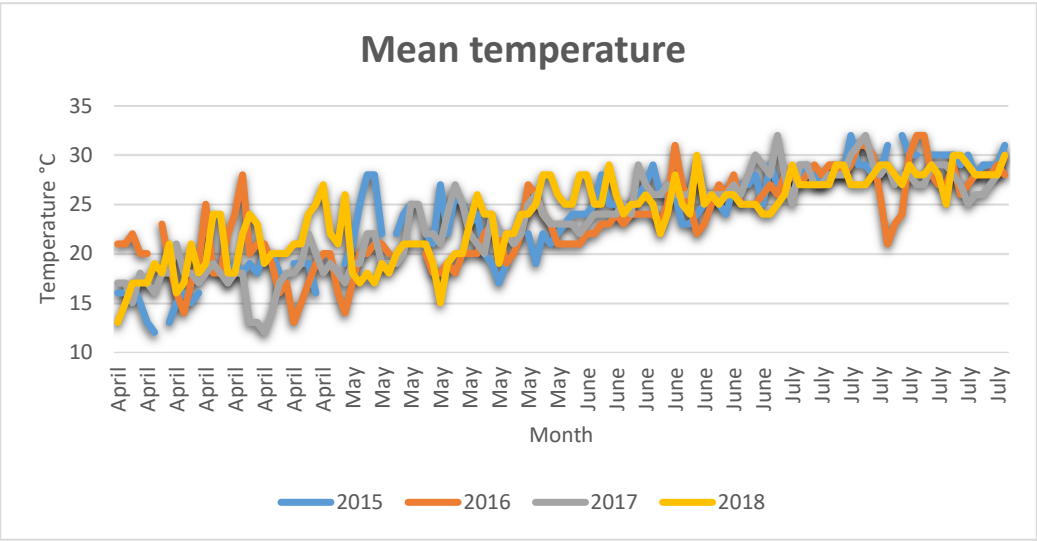

Supplementary figure S1: Mean temperatures registered from April to July (2015-2018) by the meteorological station of Battipaglia (Salerno, Italy).
